# Supplementary material
Source: publisher figshare collection journal article supplement (https://sage.figshare.com/ndownloader/files/38942770)
Supplement: Supplementary file 1 [file 38942770]

Reviewer Initials:

Study ID:

| **Study information** | |
| --- | --- |
| Author | The first author of the study/report. |
| Year | The year in which the study/report was published. |
| Journal/Site of Publication | The journal or site in which the study/report was published. |
| Country | The country where the study/report was published. |
| Type of publication | The medium in which the study was published (e.g., journal article, conference proceedings, dissertation, grey literature). |
| Study design | The research method that the study used to collect the data (e.g., RCTs, observational study, review, etc.) |
| Study objective | What the study aimed to find out. |
| Funding | Who funded the study. |
| **Population Characteristics** | |
| Role | What was the role of the research group or organization within the development of the digital health intervention? |
| Experience | What was the experience of the research group or organization? |
| **Intervention Characteristics** | |
| Intervention name | Name of the digital health intervention. |
| Platform | The platform in which the digital health intervention. as implemented (e.g., stand-alone software, app, web-based). |
| Aim of the digital health intervention | What the digital health intervention aimed to accomplish or provide (e.g., (therapy, education, counselling, self-management, screening, diagnosing). |
| **Outcome Characteristics** | |
| Measured outcome | What were the evaluations or metrics used by the study? |
| Outcome measure | How was the metric measured (e.g., questionnaire, interview, system logs, and observation)? |
| Metric selection | How was the metric selected? |
| **Miscellaneous** | |
| Relevant comments from authors |  |
| References to other relevant studies |  |
